# Supplementary material for: Replication fork stalling at DNA lesions is driven by competition between damage bypass pathways
Source: Research Square preprint supplement (doi:10.21203/rs.3.rs-8353672/v1), 2026-01-06
Supplement: Supplementary file 1 [file 9bd1be92298d58f2de08e429.docx]

**Supplementary Information**

**Replication fork stalling at DNA lesions is driven by competition between damage bypass pathways**

Amit Cohen1, Daniel Dovrat1, Wiktoria A. Kabza2, Elizabeth R. Colby3, Liliana S. Batista-Nascimento2, Nicola Zilio2, Helle D. Ulrich2*, and Amir Aharoni1*

1Department of Life Sciences and the National Institute for Biotechnology in the Negev, Ben-Gurion University of the Negev, Be’er Sheva 84105, Israel. 2Institute of Molecular Biology gGmbH, Ackermannweg 4, 55128 Mainz, Germany. 3Bristol Renal, Bristol Medical School, University of Bristol, Bristol, United Kingdom.

*****Correspondence: [H.Ulrich@imb-mainz.de](mailto:H.Ulrich@imb-mainz.de) (H.D.U), [aaharoni@bgu.ac.il](mailto:aaharoni@bgu.ac.il) (A.A)


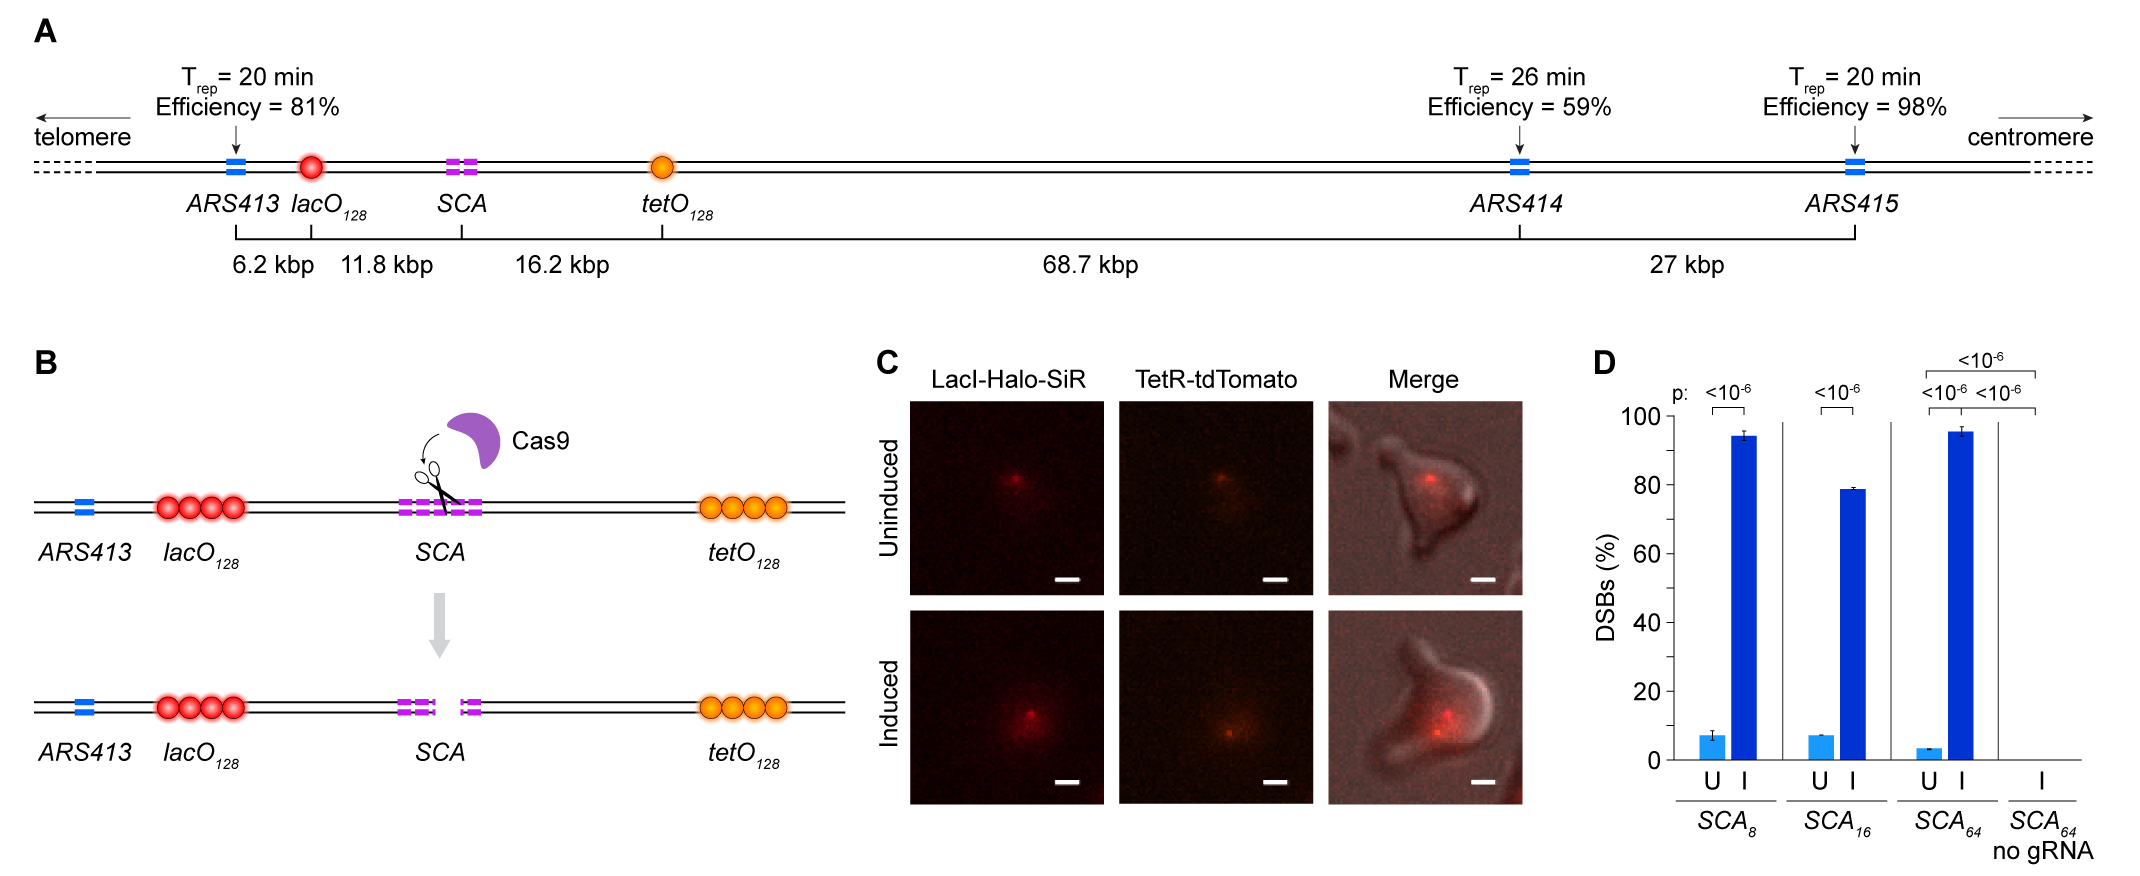


**Supplementary Fig. 1: Validation of the system for the introduction of locus-specific AP sites.** (**A**) Schematic of the region surrounding *ARS413* and the target sequence used for monitoring replication. Active replication origins in this region are shown in light blue, with their respective initiation times and firing efficiencies. Placement of the *lacO* and *tetO* arrays close to *ARS413*, coupled with the characteristics of the downstream *ARS414* origin (late firing, low efficiency, and distant location), ensures that both arrays are predominantly replicated by forks originating from *ARS413.* (**B-D**) Live Cas9 is efficiently recruited to the *SCA* and induces local DSBs.(**B**) Schematic showing live Cas9 recruitment to the *SCA*, leading to DSB formation and separation of the two reporter arrays. (**C**) Representative uninduced and induced cells showing colocalization and separation of the *lacO* and *tetO* foci, respectively. (**D**) Percentage of cells with DSBs, measured in strains harboring the different *SCAs* and matching gRNA in uninduced (U) or induced (I) conditions. A *SCA64* strain without gRNA serves as a control for non-specific damage.


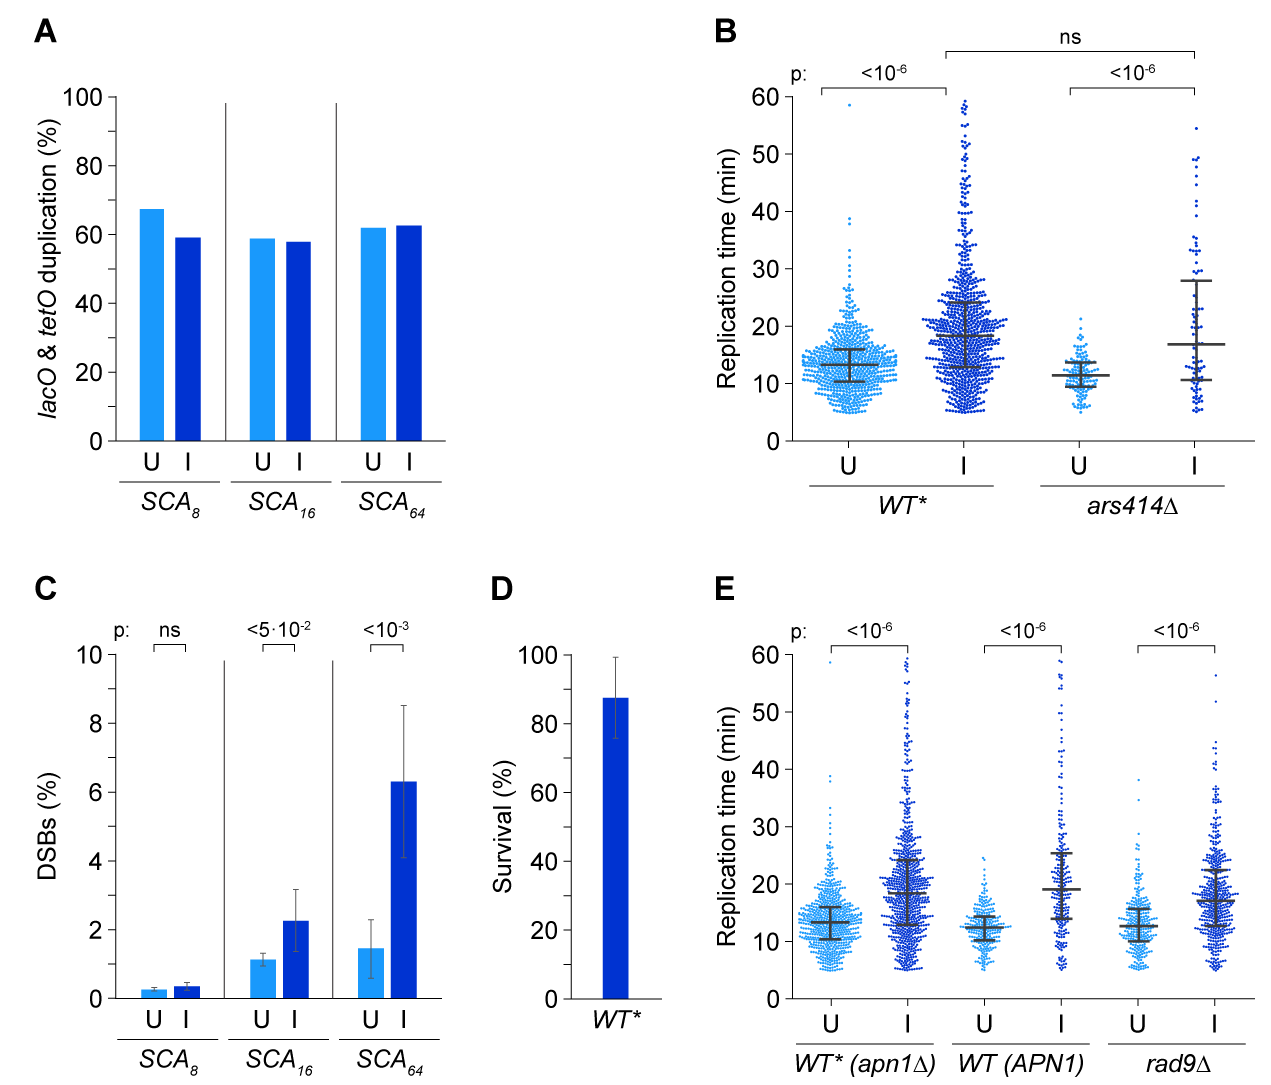


**Supplementary Fig. 2: AP sites are successfully bypassed during replication of the *SCA* locus.** (**A**) Induction of dCas9-UDG* does not influence the percentage of cells replicating both the *lacO* and the downstream *tetO* array, indicating successful fork passage through the *SCA*. Values correspond to the percentage of cells that duplicate both *lacO* and *tetO* out of the total number of cells showing *lacO* duplication with uninduced (U) or induced (I) dCas9-UDG*. Note that values are below 100% in all conditions due to technical reasons, including loss of the focal plane or bleaching of the *tetO* signal over time. (**B**) Deletion of *ARS414* has no effect on the timing of replication through the *SCA*, indicating that the locus is predominantly replicated from *ARS413*. Replication times were measured with uninduced (U) or induced (I) dCas9-UDG* in *WT** or *ars414Δ* cells containing *SCA64*. (**C**) Induction of dCas9-UDG* leads to low levels of DSBs in strains containing *SCA8, SCA16*, or *SCA64*. The percentage of cells exhibiting separation of *lacO* and *tetO* foci was determined using an automated script for image analysis (see Methods). (**D**) Induction of dCas9-UDG* does not strongly affect the viability of *WT** *SCA64* cells. Viability was measured by colony formation and plotted as normalized to uninduced conditions. (**E**) Checkpoint activation and BER activity contribute little to replication slowdown through the AP sites. Replication times were recorded with uninduced (U) or induced (I) dCas9-UDG* in *WT** (*apn1∆*), *WT* (*APN1*), and *rad9Δ* cells. The *rad9Δ* and *ars414Δ* mutants were generated in the *WT** background.


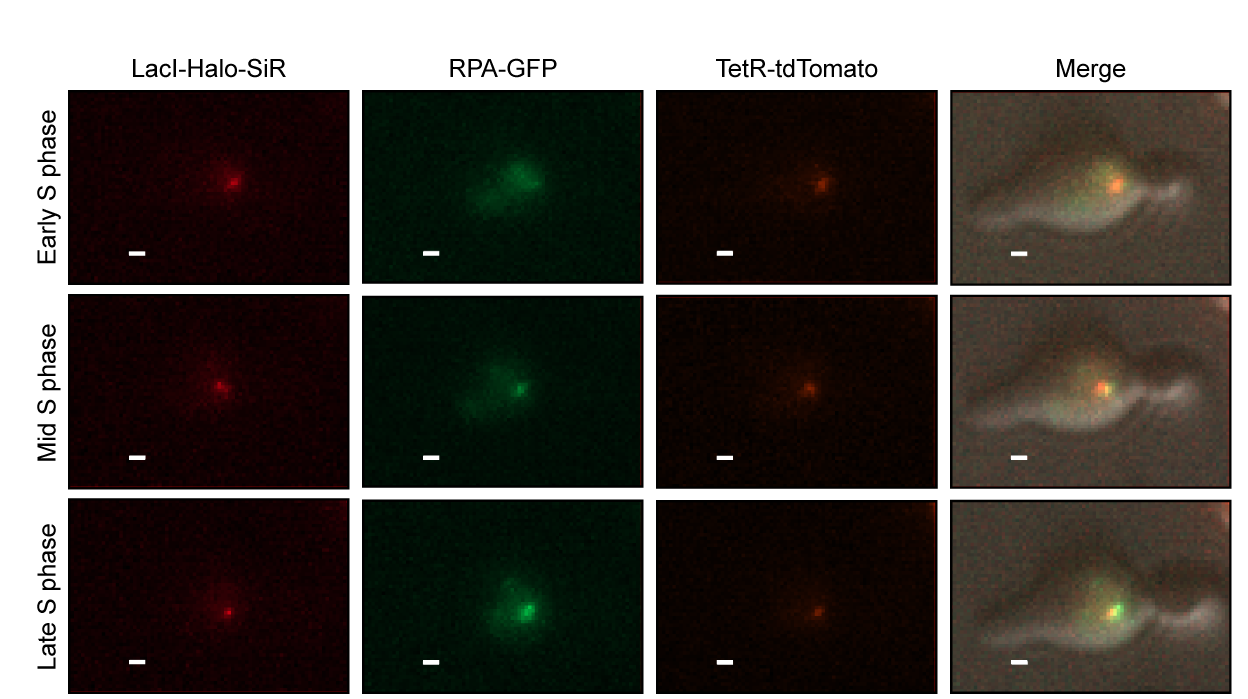


**Supplementary Fig. 3: AP sites cause the formation of localized RPA foci.** A representative *WT** cell harboring *SCA64* was imaged during cell cycle progression after induction of dCas9-UDG* in G1. An RPA focus (RPA-GFP) that colocalizes with the labeled arrays (visible as LacI-Halo-SiR and TetR-tdTomato foci) appears during cell cycle progression (scale bar: 2 m).


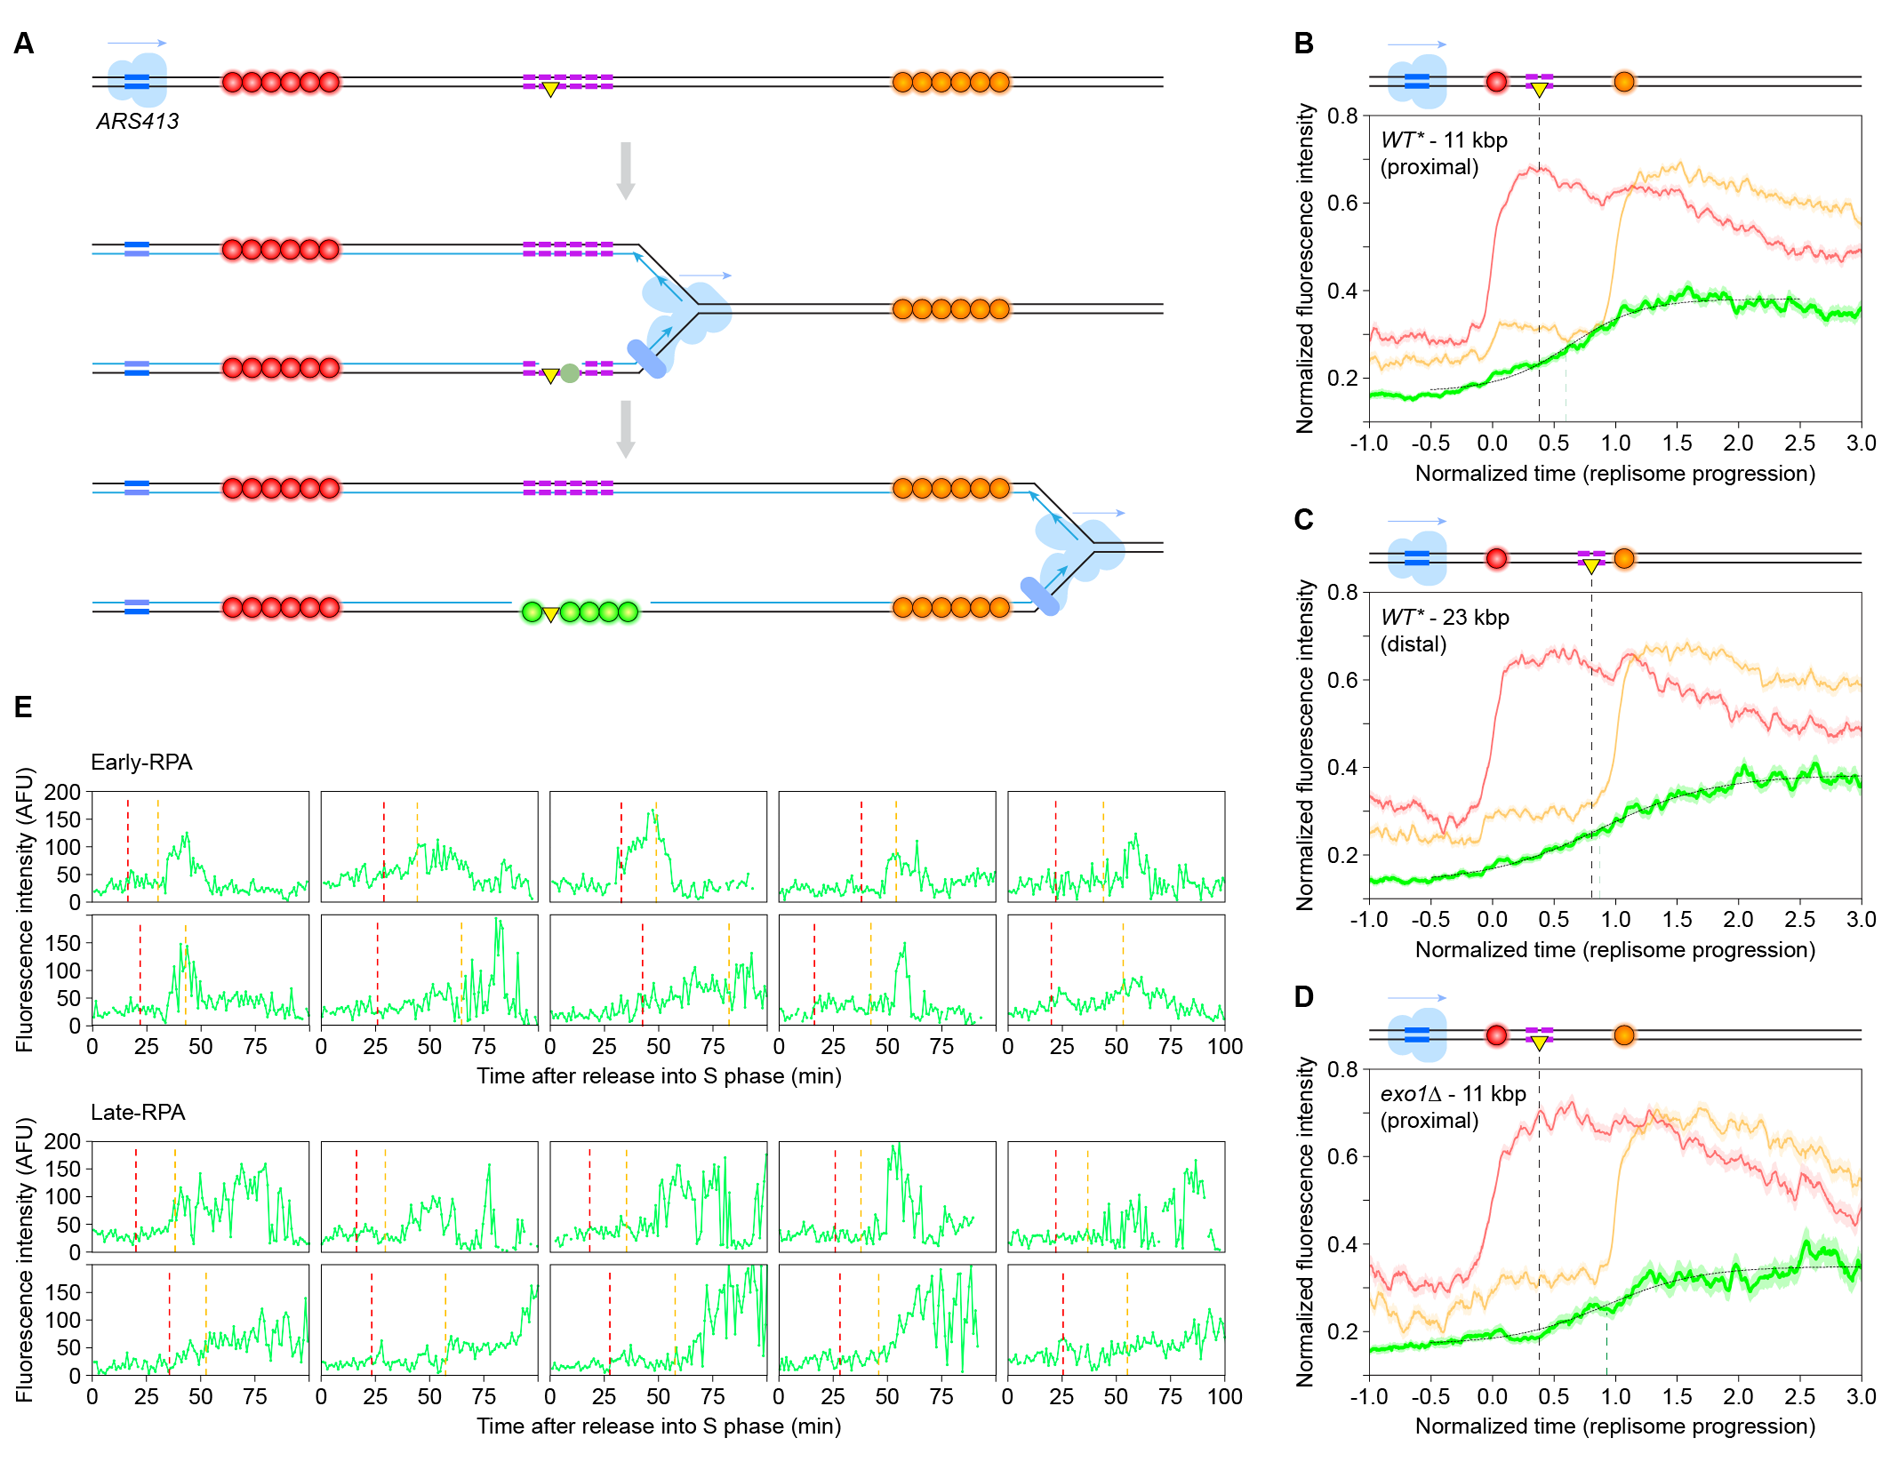


**Supplementary Fig. 4: RPA foci formation is associated with replication fork progression through the damaged *SCA*.** (**A**) Schematic illustration of replicative bypass of the AP sites and subsequent daughter-strand gap expansion, resulting in an observable RPA focus. (**B-C**). RPA foci formation follows replisome progression through the damaged *SCA*. RPA foci dynamics after dCas9-UDG* induction was measured during replication in *WT** cells harboring *SCA64* located either at a proximal position (11 kbp from *ARS413*) (**B**), or at a distal position (23 kbp from *ARS413*) (**C**). RPA foci formation is delayed in the *SCA64*-distal strain relative to the *SCA64*-proximal strain in accordance with the more distal position of the *SCA64* (RPA midpoints: 0.63 and 0.87, respectively). (**D**) RPA foci formation is delayed in induced *exo1Δ* cells harboring *SCA64* (RPA midpoint: 0.93), relative to the respective *WT** cells, suggesting that RPA foci mark expanded daughter-strand gaps. Dashed lines represent the respective location of the *SCA64* (black) and the midpoint of GFP fluorescence intensity (green). Panel **B** is from **Fig. 4A** and is shown for comparison. (**E**) RPA foci formation proceeds more gradually in late-RPA cells. Images show absolute time courses of GFP fluorescence after release into S phase for individual cells randomly selected from the early- and late-RPA populations. Dashed lines indicate midpoints of *lacO* (red) and *tetO* (orange) duplication (AFU: arbitrary fluorescence units).


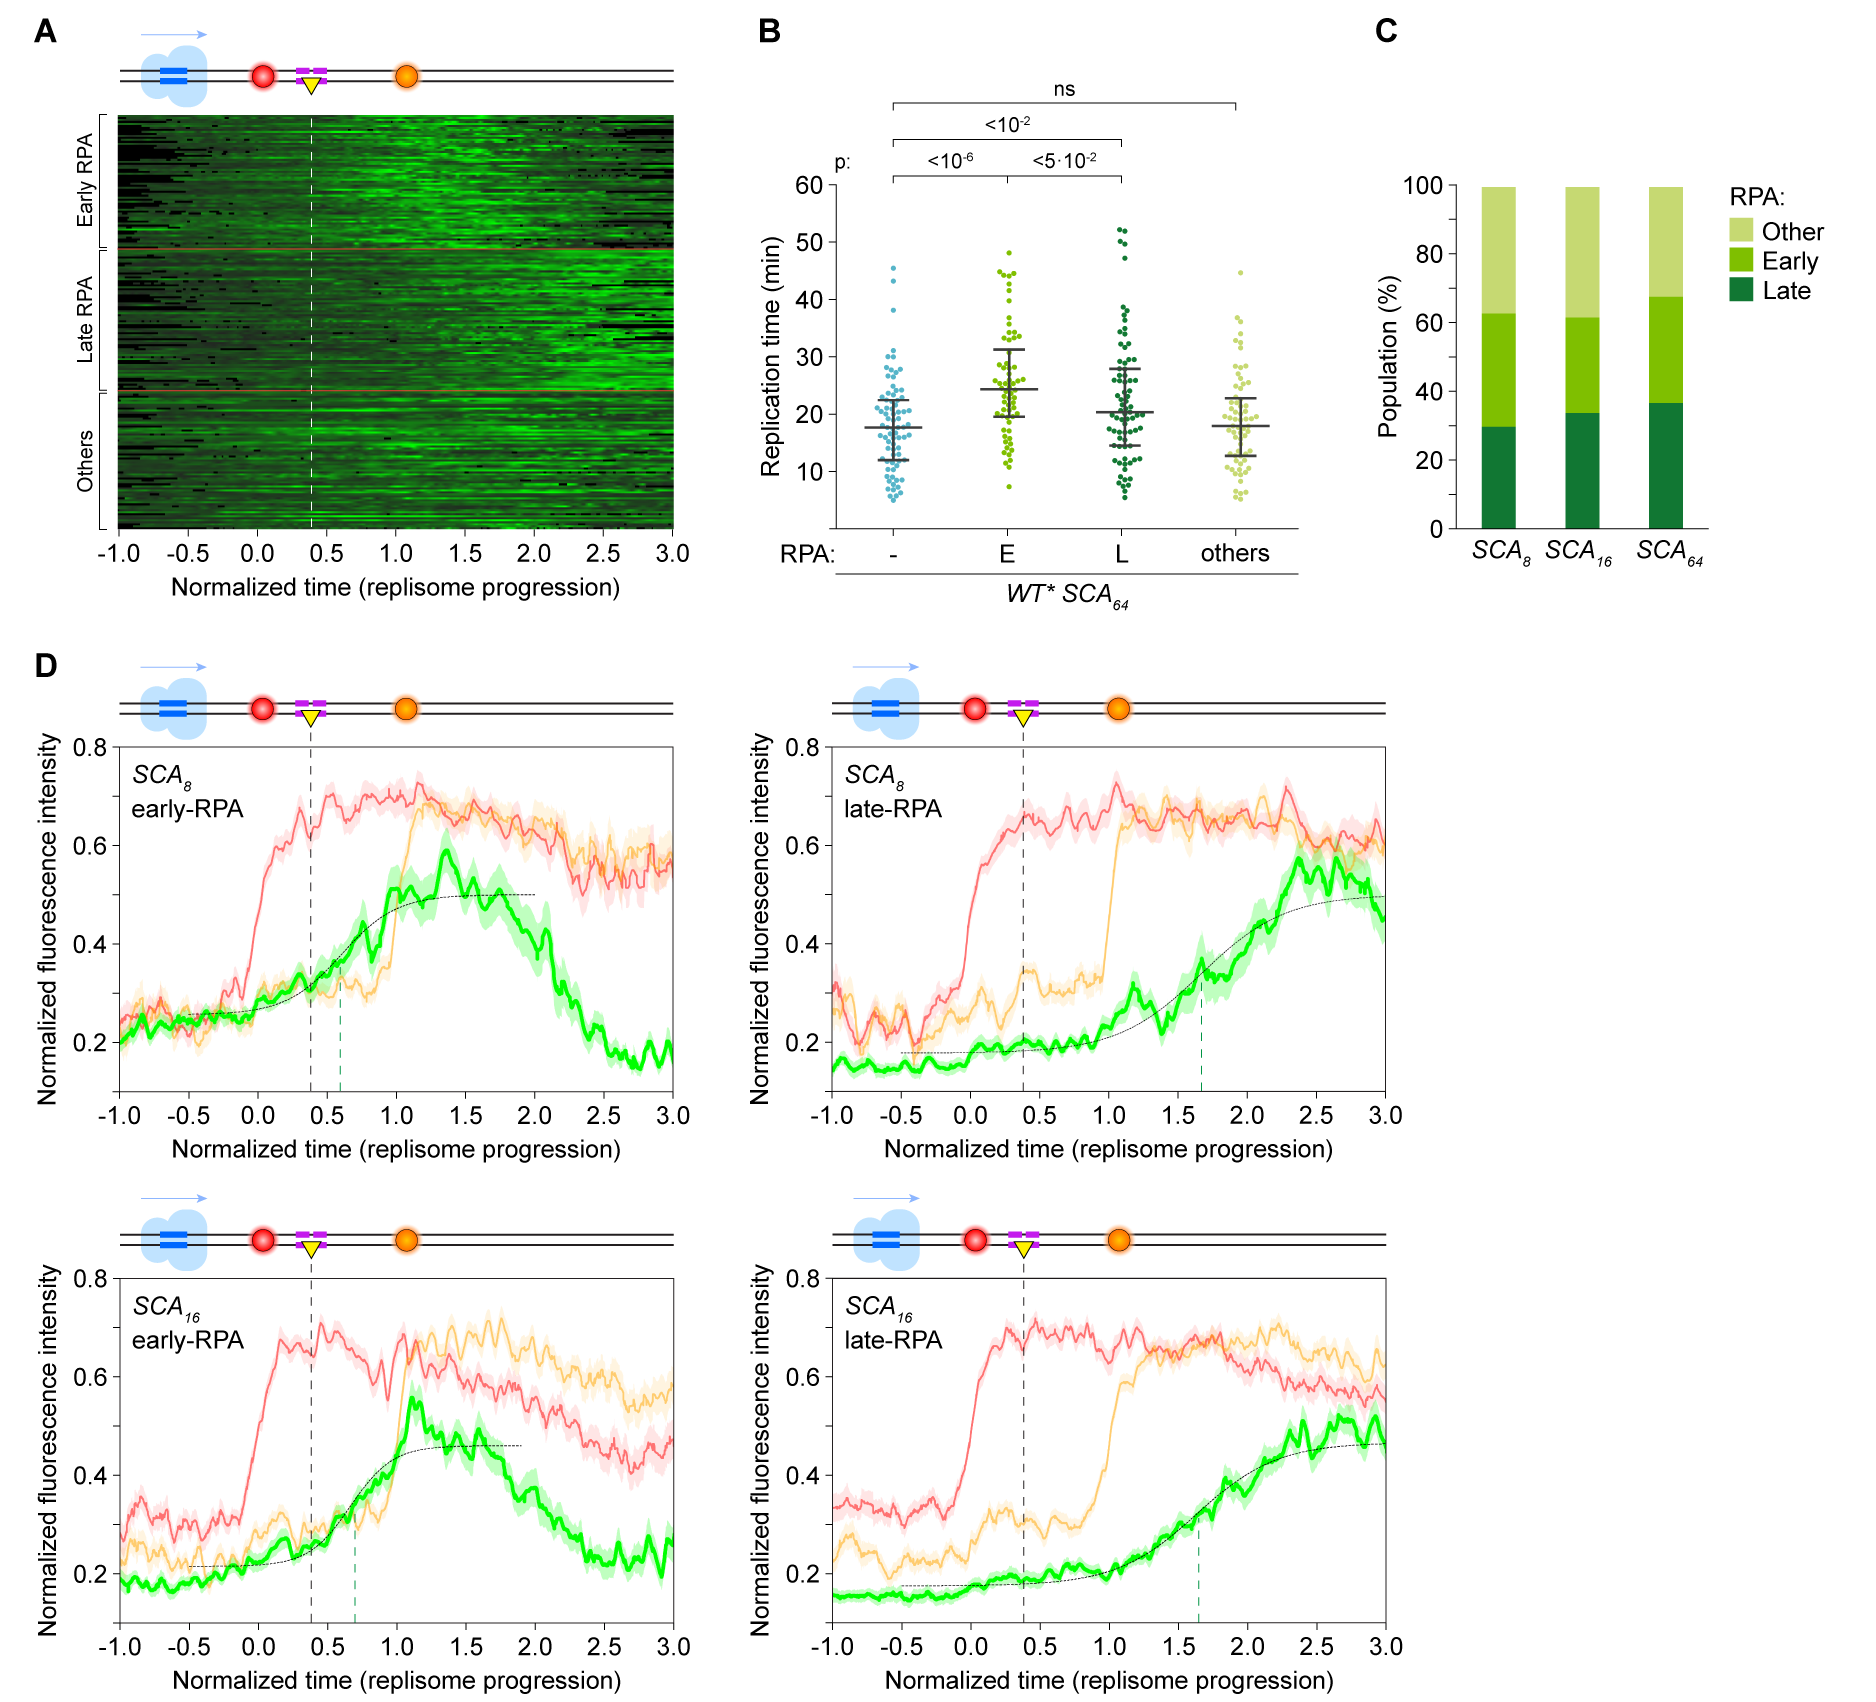


**Supplementary Fig. 5: Three subpopulations with distinct RPA foci dynamics are identified among RPA-positive cells.** (**A**) Heat map analysis of RPA foci dynamics of all RPA-positive cells containing *SCA64* allows the identification of early-RPA and late-RPA subpopulations in addition to cells with no distinct RPA foci dynamics (“others”). (**B**) Cells with undefined RPA pattern (“others”) exhibit replication times comparable to those of RPA-negative cells. (**C**) The distribution of subpopulations among RPA-positive cells is largely independent of the damage load imposed by *SCA8*, *SCA16*, and *SCA64*. (**D**) RPA foci dynamics of early- and late-RPA cells harboring *SCA8* or *SCA16* resemble those of *SCA64* cells (see also **Fig. 4** and **Table S1**). Dashed lines represent the location of the *SCA* (black) and the midpoint of GFP fluorescence (green). RPA midpoint values for early- and late-RPA cells are 0.6 and 1.67, respectively, for *SCA8* and 0.67 and 1.63, respectively, for *SCA16*.


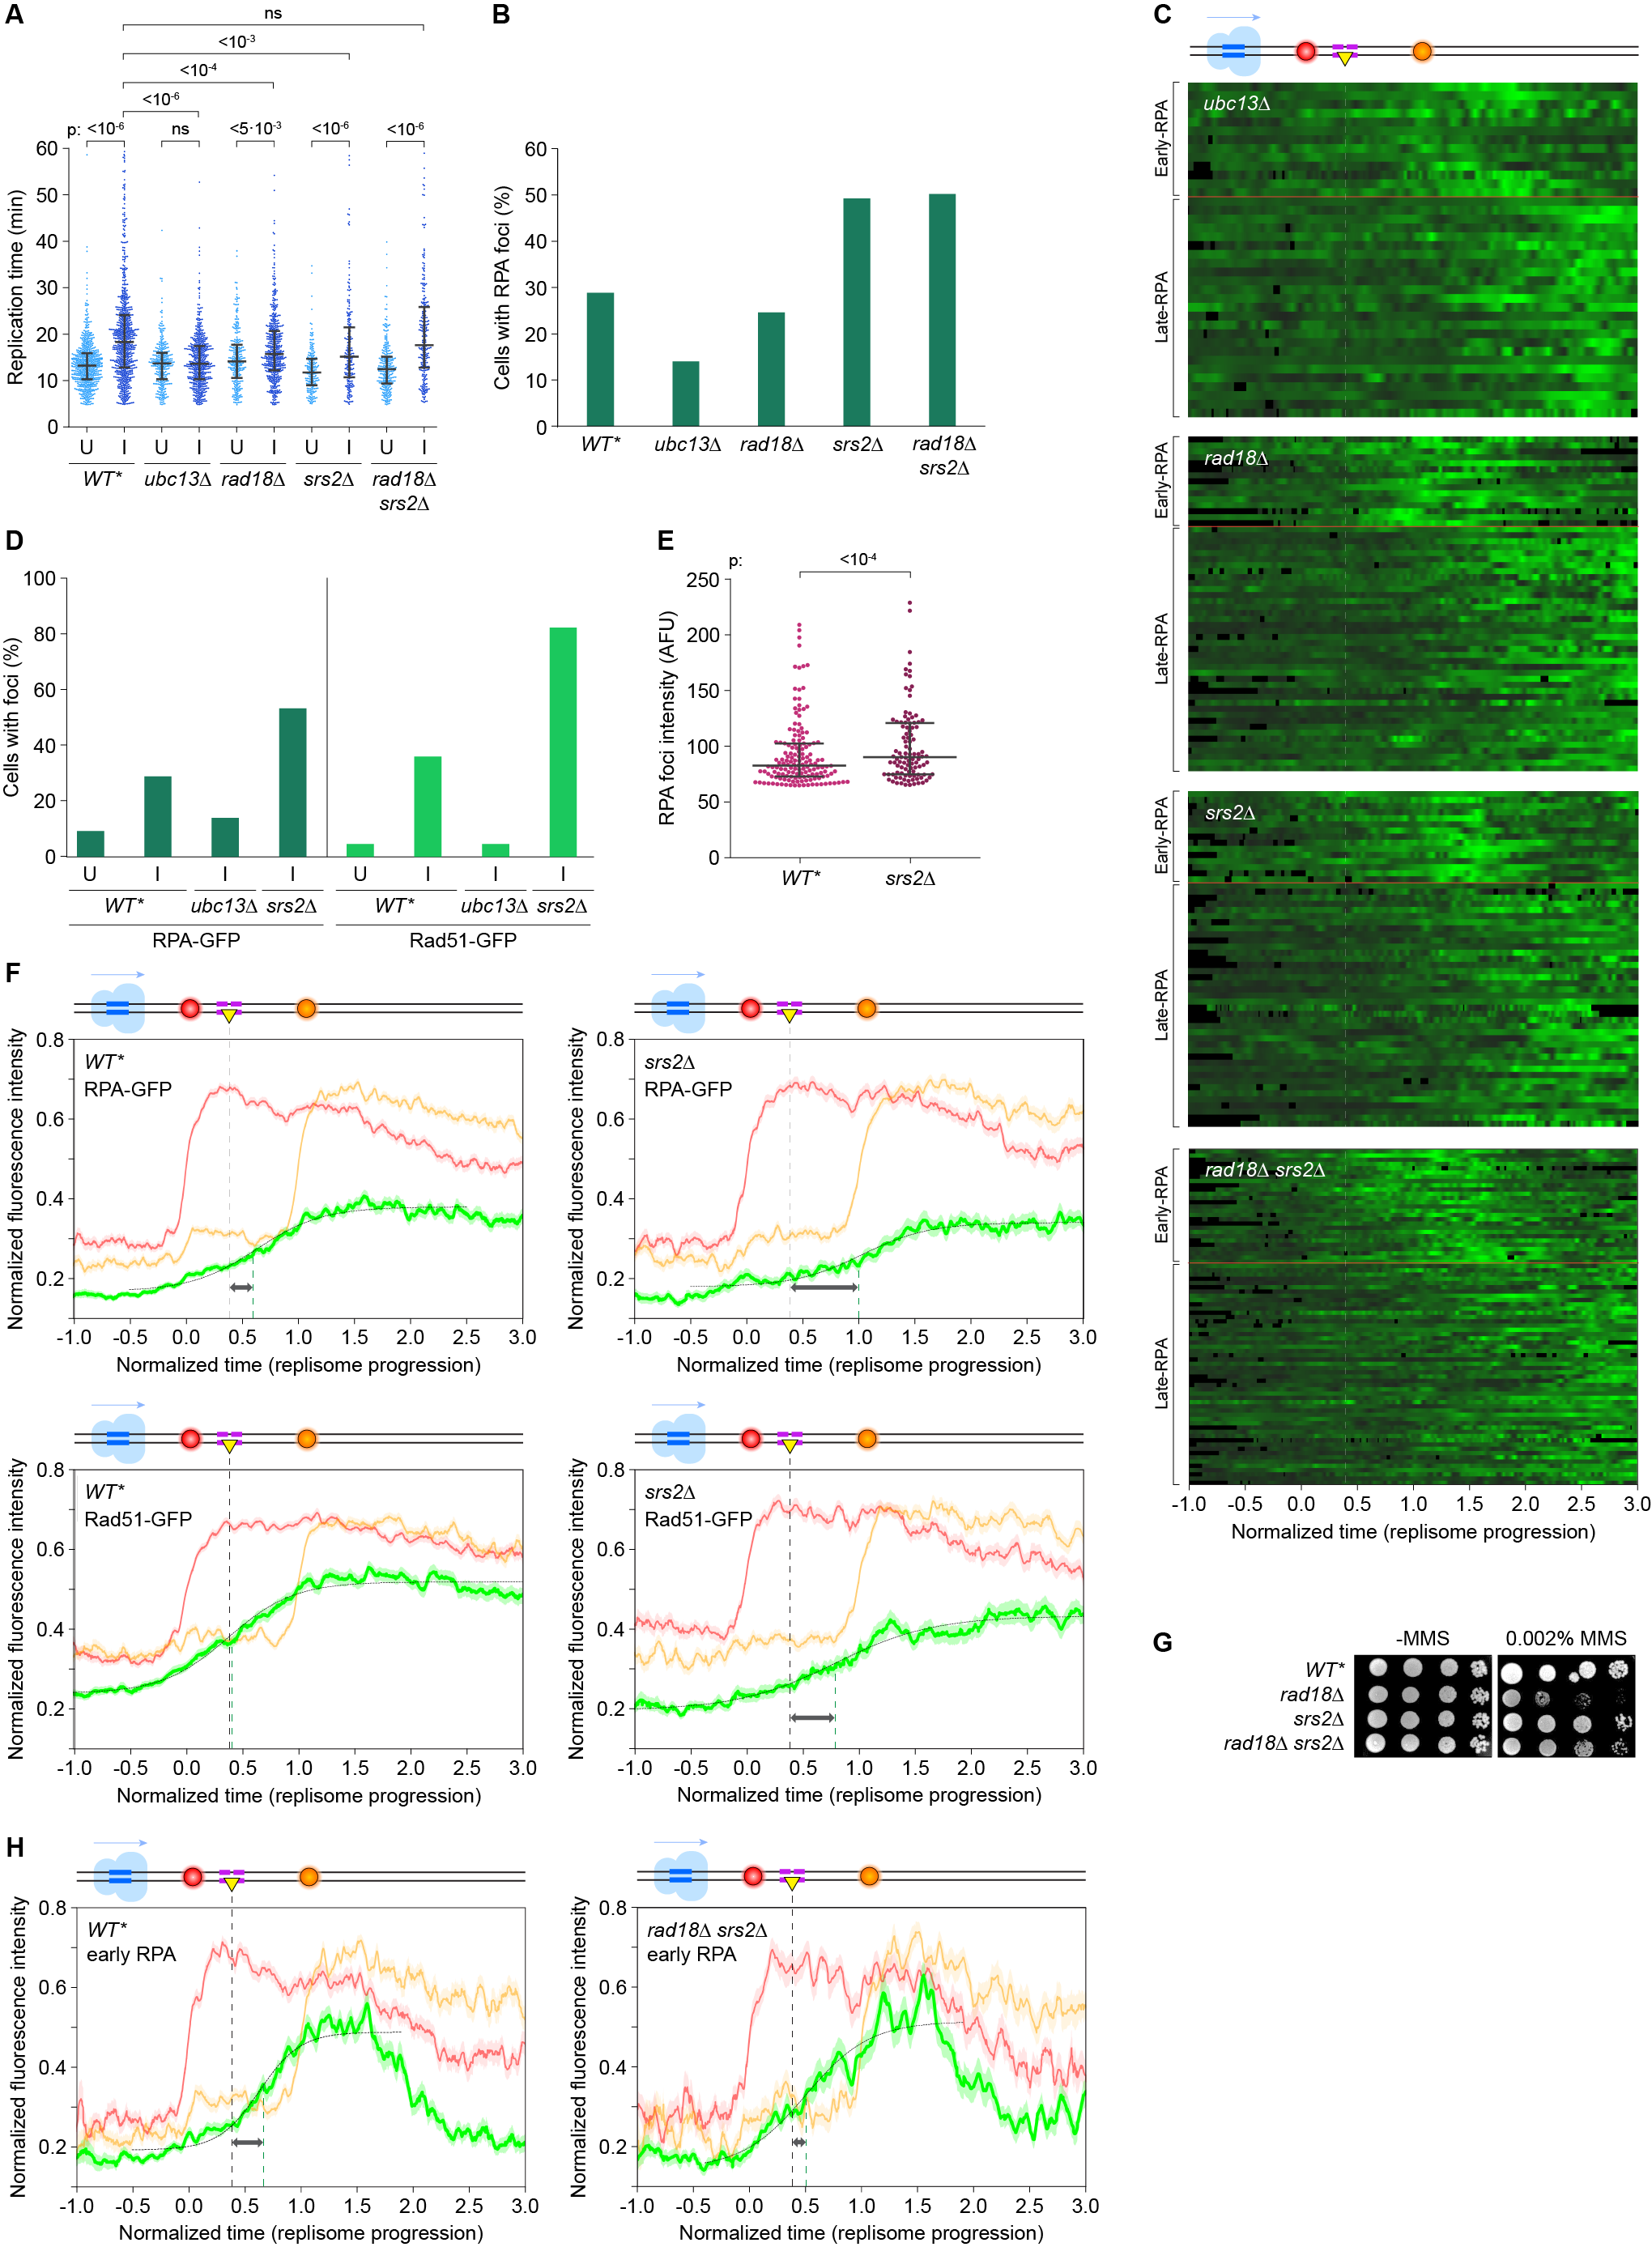


**Supplementary Fig. 6: Replication delay and RPA or Rad51 foci dynamics are impacted by defects in ubiquitin-dependent DDT.** (**A**)Replication delays following dCas9-UDG* induction are suppressed in *ubc13Δ*, *rad18Δ*, and *srs2Δ* but not in the *rad18Δ* *srs2Δ* double mutant. Replication times for *WT** and the indicated mutants are shown for uninduced (U) or induced (I) conditions. (**B**) TS defects cause a reduction in the fraction of cells exhibiting RPA foci relative to *WT** cells upon dCas9-UDG* induction, while deletion of *SRS2* or *RAD18* and *SRS2* enhances foci formation. (**C**) Deletion of *UBC13*, *RAD18*, or *SRS2* shifts the timing of RPA foci towards the late-RPA subpopulation, while the double deletion of *RAD18* and *SRS2* causes no delay in the timing of RPA foci (see also panel **H**). (**D**) Induction of AP sites does not induce Rad51 foci in *ubc13Δ* but causes enhanced formation in *srs2Δ* compared to *WT** cells. The percentage of RPA-positive cells is shown for comparison. (**E**) Deletion of *SRS2* leads to enhanced RPA foci intensity compared to *WT** cells. (**F**) Formation of RPA and Rad51 foci is delayed in *srs2Δ* (midpoints: 1.03 and 0.82) *versus* *WT** cells (midpoints: 0.63 and 0.40). Dashed lines mark the *SCA64* position and the RPA or Rad51 midpoints. (**G**) Deletion of *SRS2* suppresses the sensitivity of *rad18Δ* towards MMS. Spot assays show growth on solid medium after spotting 10-fold serial dilutions of the indicated cultures. (**H**) Formation of early RPA foci is accelerated in *rad18Δ srs2Δ* (midpoint 0.50) *versus* *WT** cells (midpoint: 0.63, see **Fig. 4C**). Dashed lines mark the *SCA64* position and the RPA midpoints. All mutants were generated in the *WT** background.


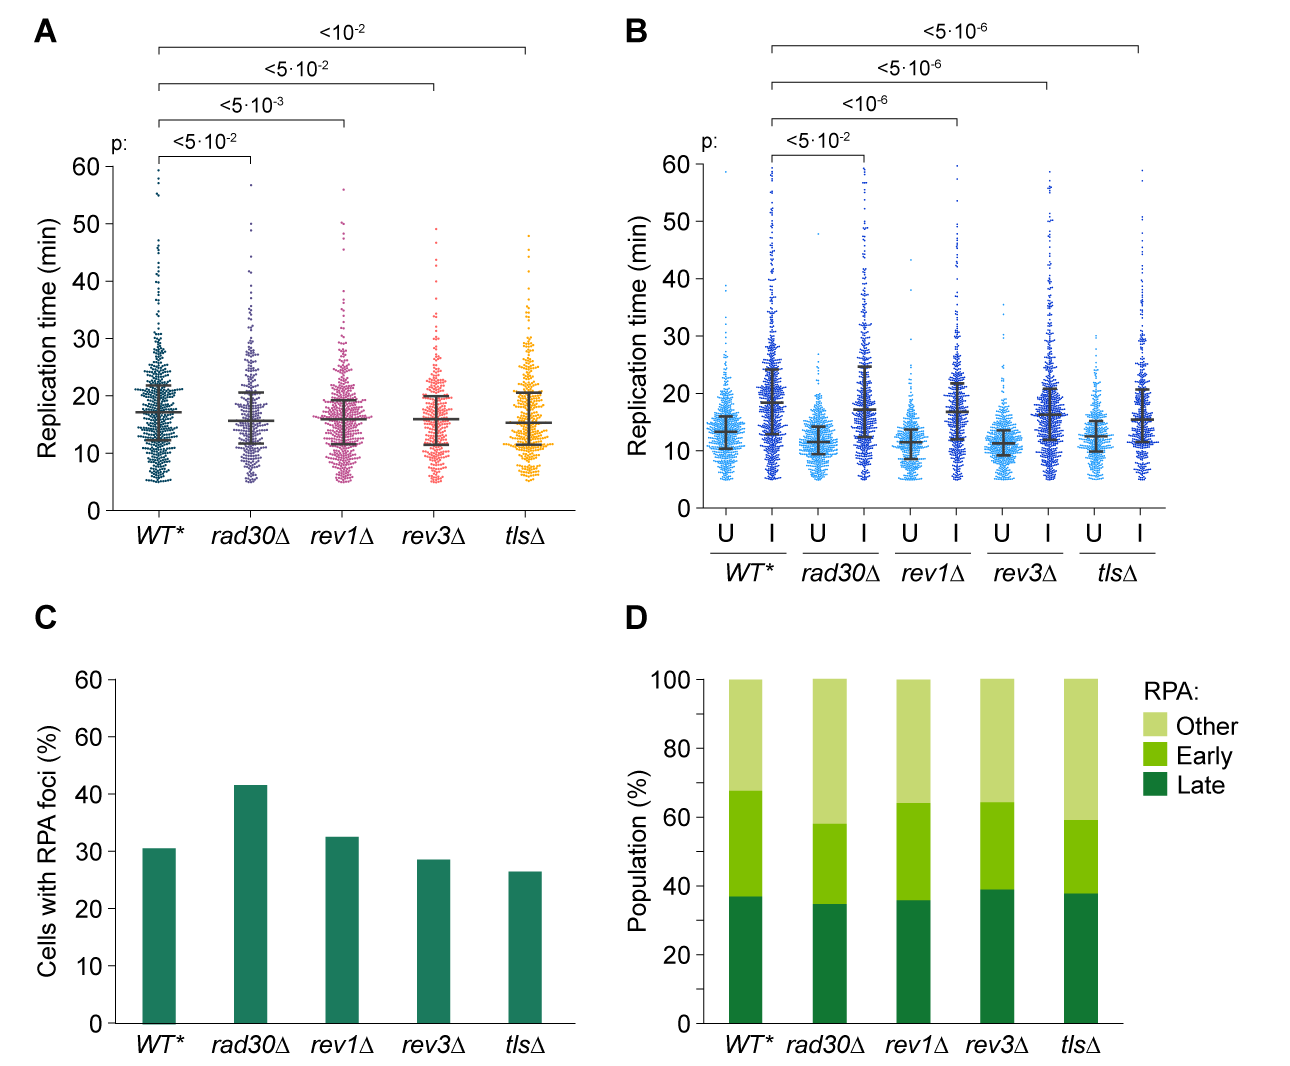


**Supplementary Fig. 7: TLS polymerases affect damage-induced replication delay and RPA foci dynamics.** (**A-B**) TLS defects partially suppress the dCas9-UDG*-induced replication delay. Replication times are plotted for RPA-negative cells (**A**) or total induced (I) and uninduced (U) cells (**B**). (**C**) Deletion of *RAD30* causes an increase in the proportion of RPA-positive cells in response to AP site induction. (**D**) TLS defects have little impact on the distribution of the RPA-positive subpopulations. All mutants were generated in the *WT** background.

**Supplementary Table 1:** Midpoint values of RPA foci appearance (GFP fluorescence increase) during replication fork progression through the *SCA*

| **Straina** | **Type of**  ***SCA*** | **Location of *SCA*b** | **Midpoint distance from *SCA***  **RPA-positivec** | **Midpoint distance from *SCA***  **Early-RPAc,d** | **Midpoint distance from *SCA***  **Late-RPAc,d** |
| --- | --- | --- | --- | --- | --- |
| *WT** | *SCA8* | 11 kbp | 8.8 kbp | 4.8 kbp | 31.9 kbp |
| *WT** | *SCA16* | 11 kbp | 7.6 kbp | 6.5 kbp | 31.4 kbp |
| *WT** | *SCA64* | 12 kbp | 5.9 kbp | 5.9 kbp | 31.5 kbp |
| *WT** | *SCA64* | 24 kbp | 12.7 kbp | ND | ND |
| *exo1****∆*** | *SCA64* | 12 kbp | 14.1 kbp | ND | ND |
| *ubc13****∆*** | *SCA64* | 12 kbp | 22.9 kbp | 11.3 kbp | 36.9 kbp |
| *rad18****∆*** | *SCA64* | 12 kbp | 14.6 kbp | 6.3 kbp | 34.1 kbp |
| *srs2****∆*** | *SCA64* | 12 kbp | 17.0 kbp | 11.3 kbp | 30.4 kbp |
| *rad18****∆***  *srs2****∆*** | *SCA64* | 12 kbp | 5.6 kbp | 2.2 kbp | 34.7 kbp |
| *rad30****∆*** | *SCA64* | 12 kbp | 5.9 kbp | 2.2 kbp | 31.6 kbp |
| *rev1****∆*** | *SCA64* | 12 kbp | 5.5 kbp | 6.6 kbp | 34.7 kbp |
| *rev3****∆*** | *SCA64* | 12 kbp | 8.4 kbp | 4.7 kbp | 29.2 kbp |
| *tls****∆*** | *SCA64* | 12 kbp | 8.7 kbp | 1.3 kbp | 29.5 kbp |

a *WT** carries the *apn1****∆*** mutation; all mutants were generated in the *WT** background.

b Distance from *ARS413*.

c Midpoint values of GFP fluorescence increase during replisome progression are presented as kbp distance from the *SCA*. “RPA-positive” designates all cells containing colocalized RPA foci above the threshold; “early-RPA” and “late-RPA” indicate the respective subpopulations according to the clustering shown in **Fig. 4B**.

dND – not determined.

**Supplementary Table 2:** Proportion of cells undergoing anaphase within 80 min after duplication of *tetO128*

| **Straina** | **Uninducedb** | **RPA-negativeb** | **Early-RPAb** | **Late-RPAb** |
| --- | --- | --- | --- | --- |
| *WT* SCA8* | 54/55 (98%) | 55/58 (95%) | 24/27 (89%) | 16/27 (59%) |
| *WT* SCA16* | 36/40 (90%) | 45/51 (88%) | 16/24 (67%) | 7/19 (37%) |
| *WT* SCA64* | 31/43 (72%) | 40/60 (67%) | 8/38 (21%) | 2/42 (5%) |
| *rad30Δ* | 51/54 (94%) | 34/53 (64%) | 8/30 (27%) | 4/26 (15%) |
| *rev1Δ* | 49/56 (88%) | 12/30 (40%) | 8/26 (31%) | 4/28 (14%) |
| *rev3Δ* | 45/52 (87%) | 22/54 (41%) | 9/29 (21%) | 0/26 (0%) |
| *tlsΔ* | 40/49 (82%) | 30/50 (60%) | 8/15 (53%) | 9/30 (30%) |

a*WT** carries the *apn1****∆*** mutation; all mutants were generated in the *WT* SCA64* background.

b”RPA-negative” designates cells with no colocalized RPA foci within the observation period (see Materials and Methods for criteria); “early-RPA” and “late-RPA” indicate the respective RPA-positive subpopulations according to the clustering shown in **Fig. 4B**.

**Supplementary Table 3**: Plasmids prepared and used in this study

| **Plasmida** | **Unique elements** | **Purpose** | **Yeast marker** |
| --- | --- | --- | --- |
| pAC-Cas9-27 | Cas9 expression  No gRNA | For inducible expression of Cas9 from *GAL10* promoter, w/o gRNA | *URA3* |
| pAC-Cas9-28 | Cas9 expression  with gRNA | For inducible expression of Cas9 from *GAL10* promoter, with gRNA | *URA3* |
| pAC-dCas9-53 | dCas9-UDG* expression  No gRNA | For inducible expression of dCas9-UDG* from *GAL10* promoter, w/o gRNA | *URA3* |
| pAC-dCas9-54 | dCas9-UDG* expression  with gRNA | For inducible expression of dCas9-UDG* from *GAL10* promoter, with gRNA | *URA3* |
| pAG25-GFP-RFA1 gRNA resistant | GFP amplification | For N-terminal GFP-tagging of *RFA1*, re-coded for Cas9-mediated integration | - |
| pCAS3-RFA1-g1-2 | Cas9 expression with gRNA for targeting *RFA1* | For integration of GFP at the N-terminus of *RFA1* | *URA3* |
| pDD-SCA16 | Synthetic CRISPR array containing 16 repeats | *SCA16* for integration to chrIV:340385 | - |
| pDD-SCA64 | Synthetic CRISPR array containing 64 repeats | *SCA64* for integration to chrIV:340385 | - |
| pAC-SCA64-3rd | Synthetic CRISPR array containing 64 repeats, 3rd integration targets | *SCA64* for integration to chrIV:358551 | - |
| pDDNat-3rd | *NatMX* Cassette with 3rd integration targets | *NatMX*-3rd for SCA integration to chrIV:358551 | *NAT* |

aAll plasmids contain a bacterial origin of replication and an ampicillin resistance cassette.

**Supplementary Table 4:** *S. cerevisiae* strains used in this study

| **Straina** | **Unique feature** | **Genotype** | **Source** |
| --- | --- | --- | --- |
| W1588 | - | MATa *leu2-3,112* *trp1-1* *can1-100* *ura3-1* *ade2-1* *his3-11,15* *RAD5* | Kupiec lab TAU |
| AA849 | Replication system | W1588 chrIV:332960::*lacO128* *pdr5*::*lacI-Halo* chrIV:352560::*tetO128* *ADE1*::*tetR-tdTomato*+*TIR1* *RFA1*::*RFA1-GFP* | This study |
| AA1568 | Empty gRNA  Cas9 *SCA64* | AA849 chrIV:340385::*SCA64* *ura3-1*::*URA3*-*GAL10p*-Cas9-IAA-empty gRNA *apn1*Δ *trp1*::*TRP1-GEM* | This study |
| AA1427 | Empty gRNA  dCas9-UDG*  *SCA64* | AA849 chrIV:340385::*SCA64* *ura3-1*::*URA3*-*GAL10p*-dCas9-UDG*-IAA-9xFlag-empty gRNA *apn1*Δ *aur1*::*AUR1-GEM* | This study |
| AA1461 | *WT*, gRNA dCas9-UDG*  *SCA64* | AA849 chrIV:340385::*SCA64* *ura3-1*::*URA3*-*GAL10p*-dCas9-UDG*-IAA-9xFlag-gRNA *trp1*::*TRP1-GEM* | This study |
| AA1626 | *WT**, gRNA  Cas9 *SCA8* | AA849 chrIV:340385::*SCA8* *ura3-1*::*URA3*-*GAL10p*-Cas9-IAA- gRNA *apn1*Δ *aur1*::*AUR1-GEM* | This study |
| AA1602 | *WT**, gRNA  Cas9 *SCA16* | AA849 chrIV:340385::*SCA16* *ura3-1*::*URA3-GAL10p*-Cas9-IAA-gRNA *apn1*Δ *aur1*::*AUR1-GEM* | This study |
| AA1455 | *WT**, gRNA  Cas9 *SCA64* | AA849 chrIV:340385::*SCA64* *ura3-1*::*URA3-GAL10p*-Cas9-IAA-gRNA *apn1*Δ *trp1*::*TRP1-GEM* | This study |
| AA1623 | *WT**, gRNA  dCas9-UDG*  *SCA8* | AA849 chrIV:340385::*SCA8* *ura3-1*::*URA3-GAL10p*-dCas9-IAA-UDG*-IAA-9xFlag-gRNA *apn1*Δ *trp1*::*TRP1-GEM* | This study |
| AA1607 | *WT**, gRNA  dCas9-UDG*  *SCA16* | AA849 chrIV:340385::*SCA16* *ura3-1*::*URA3-GAL10p*-dCas9-IAA-UDG*-IAA-9xFlag-gRNA *apn1*Δ *trp1*::*TRP1-GEM* | This study |
| AA1428 | *WT**, gRNA  dCas9-UDG*  *SCA64* | AA849 chrIV:340385::*SCA64* *ura3-1*::*URA3-GAL10p*-dCas9-IAA-UDG*-IAA-9xFlag-gRNA *apn1*Δ *trp1*::*TRP1-GEM* | This study |
| AA1548 | *WT**, gRNA  dCas9-UDG*  *SCA64* distal | AA849 chrIV:352558::*SCA64* *ura3-1*::*URA3-GAL10p*-dCas9-IAA-UDG*-IAA-9xFlag-gRNA *apn1*Δ *aur1*::*AUR1-GEM* | This study |
| AA1512 | *exo1****∆*** | AA1428 *exo1*::*KanMX* | This study |
| AA1436 | *ubc13****∆*** | AA1428 *ubc13*::*KanMX* | This study |
| AA1444 | *rad18****∆*** | AA1428 *rad18*::*KanMX* | This study |
| AA1543 | *srs2****∆*** | AA1428 *srs2*::*NatMX* | This study |
| AA1555 | *rad18*∆ *srs2****∆*** | AA1543 *srs2*::*NatMX* *rad18*::*KanMX* | This study |
| AA1612 | *rad30****∆*** | AA1428 *rad30*::*HIS3MX6* | This study |
| AA1613 | *rev1****∆*** | AA1428 *rev1*::*NatMX* | This study |
| AA1614 | *rev3****∆*** | AA1428 *rev3*::*KanMX* | This study |
| AA1611 | *tls****∆*** | AA1428 *aur1*::*AUR1-GEM* *rad30*::*HIS3MX6* *rev1*::*NatMX* *rev3*::*KanMX* | This study |
| AA1511 | *WT**  *Rad51-iGFP* | *RAD51*::*RAD51-iGFP* chrIV:340385::*SCA64* *ura3-1*::*URA3-GAL10p*-dCas9-IAA-UDG*-IAA-9xFlag-gRNA *apn1*Δ *trp1*::*TRP1-GEM* | This study |
| AA1526 | *ubc13****∆***  *Rad51-iGFP* | AA1511 *ubc13*::*KanMX* | This study |
| AA1537 | *srs2****∆***  *Rad51-iGFP* | AA1511 *srs2*::*NatMX* | This study |

a*APN1* was deleted in all strains in a markerless manner by replacing *APN1* with an antibiotic resistance cassette followed by removal of the cassette using CRISPR/Cas9 approach.

**Table S5: Oligonucleotides used for GLOE-Seq analysis**

| **ID** | **Name** | **Sequence (5’🡪3’)** | **Use** |
| --- | --- | --- | --- |
| 3331 | Internal locus – fwd | CCATTGGTGGTGACCTGATTA | qPCR |
| 3332 | Internal locus – rev | TTGGAAGAGCCCTTCGATTT | qPCR |
| 3790 | Extension primer | CGAGATCTACACTCTTTCCCTACACGACGCTCTTCCGATCT | GLOE-Seq |
| 3791 | Distal adaptor – top | GACTGGAGTTCAGACGTGTGCTCTTCCGATCT | GLOE-Seq |
| 3898 | Proximal adaptor – bottom | CTACACGACGCTCTTCCGATCTNNNNN*N-(NH2) | GLOE-Seq |
| 3899 | Proximal adaptor – top | (5‘PO4)AGATCGGAAGAGCGTCGTGTAGGGAAAGAGTGTAGATCTCGTTTT(3’BIOTIN) | GLOE-Seq |
| 5773 | *Not*I ChrI – fwd | AGAGTTGGGAATGTGTGCCC | qPCR |
| 5774 | *Not*I ChrI – rev | GGGCAGCAACACAAAGTGTC | qPCR |
| 5775 | *Not*I ChrII – fwd | AGAACACTGCTAAAGTAAGAGA | qPCR |
| 5776 | *Not*I ChrII – rev | TCCAGGAGCTTCAGAAATTG | qPCR |
| 5805 | *Not*I ChrIV – fwd | CCGTGGATTCAGATGCGTTG | qPCR |
| 5806 | *Not*I ChrIV – rev | CTGTTGCGGTGGTATCCTTTG | qPCR |
| 5809 | *Not*I ChrVII – fwd | GGCAAGTTAGCTGGCCTAAATG | qPCR |
| 5810 | *Not*I ChrVII – rev | CCACCACCCAAATCGTAAACTG | pPCR |
| 7060 | Distal adaptor – bottom | (5‘PO4)GATCGGAAGAGCACACGTCTGAACTCCAGTCCCC | GLOE-Seq |
| P5 | IDT P5 | AATGATACGGCGACCACCGAGATCTACACTCTTTCCCTACACGACGCTCTTCCGATCT | Sequencing |
| P7 | IDT P7 | CAAGCAGAAGACGGCATACGAGAT(X)6GTGACTGGAGTTCAGACGTGTGCTCTTCCGATCT | Sequencing |
